# Supplementary material
Source: HighWire-hosted journal article supplement (https://dmd.aspetjournals.org/highwire/filestream/78044/field_highwire_adjunct_files/0/805SupplData.pdf)
Supplement: 805SupplData.pdf [file 805SupplData.pdf]

**SUPPLEMENTARY INFORMATION**

**Inter-individual variability and differential tissue abundance of mitochondrial amidoxime reducing component (mARC) in humans**

**Deepak Ahire<sup>1</sup>, Abdul Basit<sup>1</sup>, Lisa J. Christopher<sup>2</sup>, Ramaswamy Iyer<sup>2</sup>, J. Steven Leeder<sup>3</sup>  
and Bhagwat Prasad<sup>1</sup>**

<sup>1</sup>Department of Pharmaceutical Sciences, Washington State University, Spokane, WA

<sup>2</sup>Department of Nonclinical Disposition and Bioanalysis, Bristol Myers Squibb Princeton, NJ

<sup>3</sup>Department of Pediatrics, Children's Mercy Hospitals and Clinics, Kansas City, MO

| Table S1: Optimized MS/MS parameters used for the quantification of mARC enzymes. Light peptides obtained from digestion of recombinant mARC proteins were used as the calibrators and the corresponding heavy peptides containing terminal labeled [ $^{13}\text{C}_6$ $^{15}\text{N}_2$ ]-lysine or $^{13}\text{C}_6$ $^{15}\text{N}_4$ -arginine residues served as the internal standards. |                  |               |                  |                   |         |        |
|------------------------------------------------------------------------------------------------------------------------------------------------------------------------------------------------------------------------------------------------------------------------------------------------------------------------------------------------------------------------------------------------|------------------|---------------|------------------|-------------------|---------|--------|
| Protein                                                                                                                                                                                                                                                                                                                                                                                        | Peptide Sequence | Peptide label | Parent ion (m/z) | Product ion (m/z) | CE (eV) | CV (V) |
| mARC1                                                                                                                                                                                                                                                                                                                                                                                          | DLLPIK           | light         | 406.2680<br>(+2) | 583.4178<br>(+1)  | 20      | 35     |
|                                                                                                                                                                                                                                                                                                                                                                                                |                  | light         | 406.2680<br>(+2) | 470.3337<br>(+1)  | 20      | 35     |
|                                                                                                                                                                                                                                                                                                                                                                                                |                  | light         | 406.2680<br>(+2) | 357.2496<br>(+1)  | 20      | 25     |
|                                                                                                                                                                                                                                                                                                                                                                                                |                  | heavy         | 410.2751<br>(+2) | 591.4320<br>(+1)  | 20      | 35     |
|                                                                                                                                                                                                                                                                                                                                                                                                |                  | heavy         | 410.2751<br>(+2) | 478.3479<br>(+1)  | 20      | 35     |
|                                                                                                                                                                                                                                                                                                                                                                                                |                  | heavy         | 410.2751<br>(+2) | 365.2638<br>(+1)  | 20      | 25     |
|                                                                                                                                                                                                                                                                                                                                                                                                | VGDPVYLLGQ       | light         | 530.7873<br>(+2) | 430.2660<br>(+1)  | 20      | 35     |
|                                                                                                                                                                                                                                                                                                                                                                                                |                  | light         | 530.7873<br>(+2) | 204.0979<br>(+1)  | 20      | 35     |
|                                                                                                                                                                                                                                                                                                                                                                                                |                  | heavy         | 532.2892<br>(+2) | 433.2698<br>(+1)  | 20      | 35     |
|                                                                                                                                                                                                                                                                                                                                                                                                |                  | heavy         | 532.2892<br>(+2) | 207.1016<br>(+1)  | 20      | 35     |
| mARC2                                                                                                                                                                                                                                                                                                                                                                                          | LSPLFGIYYSVE     | light         | 758.4083<br>(+2) | 958.4880<br>(+1)  | 25      | 35     |
|                                                                                                                                                                                                                                                                                                                                                                                                |                  | light         | 758.4083<br>(+2) | 788.3825<br>(+1)  | 25      | 35     |
|                                                                                                                                                                                                                                                                                                                                                                                                |                  | light         | 758.4083<br>(+2) | 625.3192<br>(+1)  | 25      | 35     |
|                                                                                                                                                                                                                                                                                                                                                                                                |                  | heavy         | 762.4154<br>(+2) | 966.5022<br>(+1)  | 25      | 35     |
|                                                                                                                                                                                                                                                                                                                                                                                                |                  | heavy         | 762.4154<br>(+2) | 796.3967<br>(+1)  | 25      | 35     |
|                                                                                                                                                                                                                                                                                                                                                                                                |                  | heavy         | 762.4154<br>(+2) | 633.3334<br>(+1)  | 25      | 35     |
|                                                                                                                                                                                                                                                                                                                                                                                                | WFTNFL           | light         | 478.2554<br>(+2) | 769.4243<br>(+1)  | 25      | 35     |
|                                                                                                                                                                                                                                                                                                                                                                                                |                  | light         | 478.2554<br>(+2) | 622.3559<br>(+1)  | 25      | 35     |
|                                                                                                                                                                                                                                                                                                                                                                                                |                  | heavy         | 482.2685<br>(+2) | 777.4385<br>(+1)  | 25      | 35     |

|  |  |       |                  |                  |    |    |
|--|--|-------|------------------|------------------|----|----|
|  |  | heavy | 482.2685<br>(+2) | 630.3701<br>(+1) | 25 | 35 |
|--|--|-------|------------------|------------------|----|----|

| <b>Table S2: Demographic information of samples used in mARC enzymes quantification</b> |                 |            |
|-----------------------------------------------------------------------------------------|-----------------|------------|
| Paired adult and pediatric liver and kidney samples                                     |                 |            |
| <b>Sample ID</b>                                                                        | <b>Age(yrs)</b> | <b>Sex</b> |
| 1078                                                                                    | 17.1            | Female     |
| 5387                                                                                    | 12.8            | Male       |
| 1670                                                                                    | 13.3            | Male       |
| 612                                                                                     | 17.0            | Male       |
| 1409                                                                                    | 18.1            | Male       |
| 1429                                                                                    | 18.7            | Male       |
| 4548                                                                                    | 20.2            | Female     |
| 4790                                                                                    | 20.3            | Female     |
| 1475                                                                                    | 20.3            | Male       |
| 1712                                                                                    | 20.4            | Male       |
| 695                                                                                     | 21.5            | Male       |
| 5602                                                                                    | 22.0            | Female     |
| 777                                                                                     | 22.9            | Male       |
| 4917                                                                                    | 22.5            | Male       |
| 289                                                                                     | 25.0            | Male       |
| 1737                                                                                    | 35.0            | Female     |
| 1380                                                                                    | 36.0            | Female     |
| Pediatric liver samples                                                                 |                 |            |
| 86                                                                                      | 0.15            | Male       |
| 195                                                                                     | 0.34            | Male       |
| 260                                                                                     | 2.00            | Male       |
| 271                                                                                     | 0.05            | Male       |
| 283                                                                                     | 0.54            | Male       |
| 322                                                                                     | 1.00            | Male       |
| 432                                                                                     | 0.01            | Male       |
| 435                                                                                     | 0.75            | Male       |
| 551                                                                                     | 4.56            | Male       |
| 569                                                                                     | 0.36            | Male       |
| 617                                                                                     | 1.95            | Female     |
| 620                                                                                     | 14.00           | Male       |
| 671                                                                                     | 0.10            | Male       |
| 677                                                                                     | 1.97            | Male       |
| 738                                                                                     | 8.92            | Female     |
| 759                                                                                     | 0.10            | Male       |
| 771                                                                                     | 2.75            | Male       |
| 774                                                                                     | 0.75            | Male       |
| 776                                                                                     | 4.00            | Female     |
| 780                                                                                     | 0.00            | Male       |

|       |       |         |
|-------|-------|---------|
| 781   | 15.00 | Female  |
| 811   | 16.00 | Male    |
| 825   | 0.37  | Male    |
| 845   | 0.03  | Male    |
| 872   | 2.00  | Male    |
| 1053  | 5.00  | Male    |
| 1055  | 0.26  | Male    |
| 1144  | 12.64 | Female  |
| 1157  | 0.05  | Female  |
| 1261  | 13.86 | Male    |
| 1281  | 8.17  | Male    |
| 1296  | 13.86 | Male    |
| 1325  | 0.50  | Female  |
| 1443  | 0.91  | Female  |
| 1482  | 0.67  | Female  |
| 1547  | 0.71  | Male    |
| 1904  | 0.27  | Male    |
| 1908  | 13.99 | Male    |
| 4787  | 12.87 | Male    |
| 4925  | 13.16 | Male    |
| 5077  | 16.71 | Female  |
| 8703  | 10.00 | Female  |
| 8804  | 14.00 | Male    |
| 8910  | 14.00 | Male    |
| 8912  | 12.00 | Female  |
| 8917  | 6.00  | Female  |
| 8920  | 11.00 | Male    |
| 8926  | 0.73  | Female  |
| 9005  | 17.00 | Male    |
| 9006  | 10.00 | Male    |
| 9011  | 3.20  | Female  |
| 9013  | 11.00 | Male    |
| 9022  | 5.00  | Unknown |
| 9023  | 2.58  | Female  |
| 9028  | 8.00  | Female  |
| 9101  | 2.00  | Male    |
| 9105  | 17.00 | Male    |
| 9127  | 15.00 | Male    |
| 9507  | 14.00 | Male    |
| 9608  | 4.00  | Male    |
| 9611  | 9.00  | Male    |
| 9612  | 3.00  | Male    |
| 70622 | 4.00  | Female  |

| 70650               | 1.90                    | Female     |                       |
|---------------------|-------------------------|------------|-----------------------|
| 70684               | 1.50                    | Female     |                       |
| 70685               | 10.00                   | Male       |                       |
| 70690               | 13.00                   | Female     |                       |
| 70701               | 3.00                    | Male       |                       |
| 70706               | 11.00                   | Female     |                       |
| 70851               | 1.00                    | Female     |                       |
| 71017               | 1.00                    | Male       |                       |
| 71032               | 15.00                   | Male       |                       |
| 71047               | 17.00                   | Male       |                       |
| 71065               | 18.00                   | Male       |                       |
| 71077               | 1.00                    | Male       |                       |
| 71414               | 8.00                    | Male       |                       |
| 71187               | 4.00                    | Male       |                       |
| 71188               | 1.90                    | Male       |                       |
| 71512               | 4.00                    | Male       |                       |
| 71616               | 9.00                    | Female     |                       |
| 70919               | 3.00                    | Female     |                       |
| Pooled S9 fractions |                         |            |                       |
| Organ               | Total number of samples | Age (year) | Sex                   |
| Liver               | 10                      | 15-64      | Male (6), Female (4)  |
| Intestine           | 15                      | 33-67      | Male (10), Female (5) |
| Kidney              | 12                      | 47-76      | Male (8), Female (4)  |
| Lung                | 11                      | 2-66       | Male (8), Female (3)  |
| Heart               | 17                      | 65-78      | Male (10), Female (7) |
| In vitro models     |                         |            |                       |
| CHIM                | 8                       | 32-60      | Male                  |
|                     | 7                       | 16-54      | Female                |
| Hepatocytes         | 10                      | 24-58      | Male                  |

| <b>Table S3:</b> Chromatographic conditions for the separation of mARC1 and mARC2 surrogate peptides |                |                                    |                                           |
|------------------------------------------------------------------------------------------------------|----------------|------------------------------------|-------------------------------------------|
| Trap column: Symmetry C18 column (100Å, 1.7 µm, 150µm * 50 mm)                                       |                |                                    |                                           |
| iKey BEH C18 column (130Å, 5 µm, 300µm * 50 mm)                                                      |                |                                    |                                           |
| Injection volume: 1 µL                                                                               |                |                                    |                                           |
| <b>LC gradient program</b>                                                                           |                |                                    |                                           |
| Time (min)                                                                                           | Flow Rate (µL) | A (Water with 0.1% formic acid, %) | B (Acetonitrile with 0.1% formic acid, %) |
| 0                                                                                                    | 3              | 97                                 | 3                                         |
| 4                                                                                                    | 3              | 97                                 | 3                                         |
| 8                                                                                                    | 3              | 87                                 | 13                                        |
| 18                                                                                                   | 3              | 70                                 | 30                                        |
| 20.5                                                                                                 | 3              | 65                                 | 35                                        |
| 21.1                                                                                                 | 3              | 40                                 | 60                                        |
| 23.1                                                                                                 | 3              | 20                                 | 80                                        |
| 23.2                                                                                                 | 3              | 97                                 | 3                                         |
| 27                                                                                                   | 3              | 97                                 | 3                                         |

**Table S4:** Analytical validation parameters of  $\mu$ LC-MS/MS method used for quantitative analysis of mARC enzymes.

| <b>Protein</b> | <b>Peptide</b> | <b>LLOQ<br/>(fmol on<br/>column)</b> | <b>ULOQ<br/>(fmol on<br/>column)</b> | <b>Linearity<br/>(R<sup>2</sup>)</b> | <b>Intraday precision<br/>(%CV for QC)</b> | <b>Interday<br/>precision<br/>(%CV for<br/>QC)</b> |
|----------------|----------------|--------------------------------------|--------------------------------------|--------------------------------------|--------------------------------------------|----------------------------------------------------|
| mARC1          | DLLLPIK        | 14.2                                 | 934223                               | 0.99                                 | 20.03                                      | 18.05                                              |
| mARC2          | LSPLFGIYYSVEK  | 2.8                                  | 44862                                | 0.99                                 | 10.29                                      | 16.97                                              |

**LLOQ:** lower limit of quantification; **ULOQ:** upper limit of quantification; **CV:** coefficient of variance; **QC:** quality control. The calibration curve range of mARC1 (84-675 fmol on-column) and mARC2 (115-925 fmol on-column) was linear and within LLOQ and ULOQ limit.



**Table S5:** Protein recovery (mg of membrane or S9 protein per gram of tissue) in different organ and scaled abundance of mARC1 and mARC2 (pmol/gm tissue).

|                                         |       | Liver   | Intestine | Kidney  | Heart | Lung   |
|-----------------------------------------|-------|---------|-----------|---------|-------|--------|
| MS9PPGT (mg S9/gram tissue)             |       | 101.05  | 38.60     | 59.40   | 26.50 | 156.59 |
| Abundance (pmol/gm tissue)              | mARC1 | 3900.53 | 255.42    | 296.45  | BLQ   | 465.07 |
|                                         | mARC2 | 3793.31 | 753.57    | 3544.38 | BLQ   | 500    |
| TM-PPGT (mg total membrane/gram tissue) |       | 49      | -         | 38      | -     | -      |
| Abundance (pmol/gm tissue)              | mARC1 | 3675    |           | 494     |       |        |
|                                         | mARC2 | 3283    |           | 4560    |       |        |

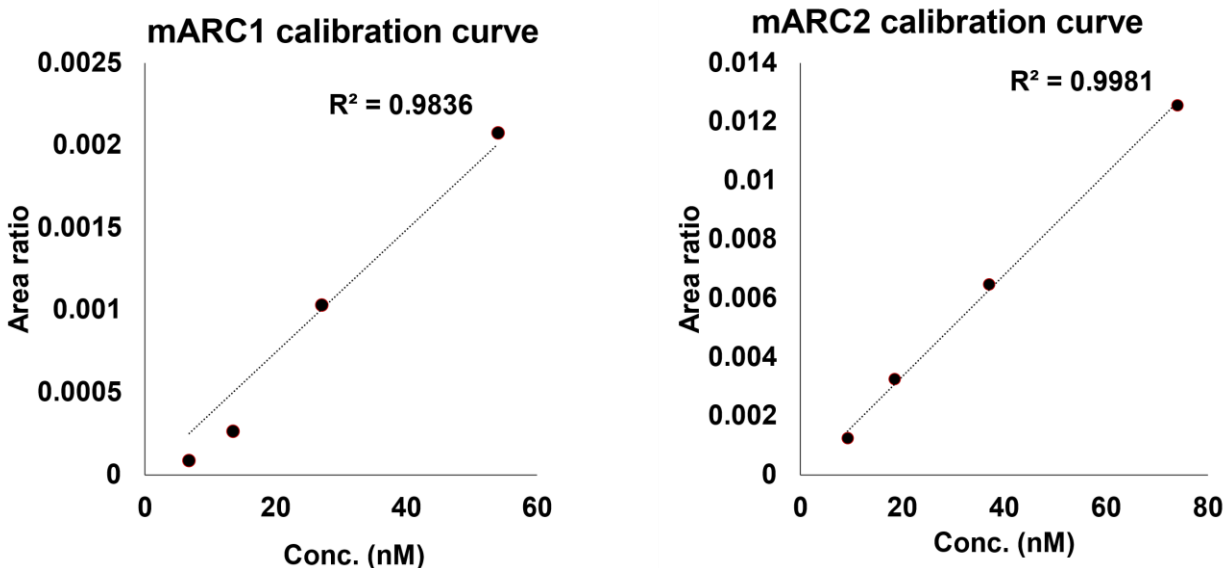

**Figure S1:** mARC1 and mARC2 calibration curve in which digests of recombinant protein served as calibrators. The dynamic range of the method was linear between 6.74 to 54 nM for mARC1 ( $R^2=0.98$ ) and 9.25 to 74 nM for mARC2 ( $R^2=0.99$ ), respectively.

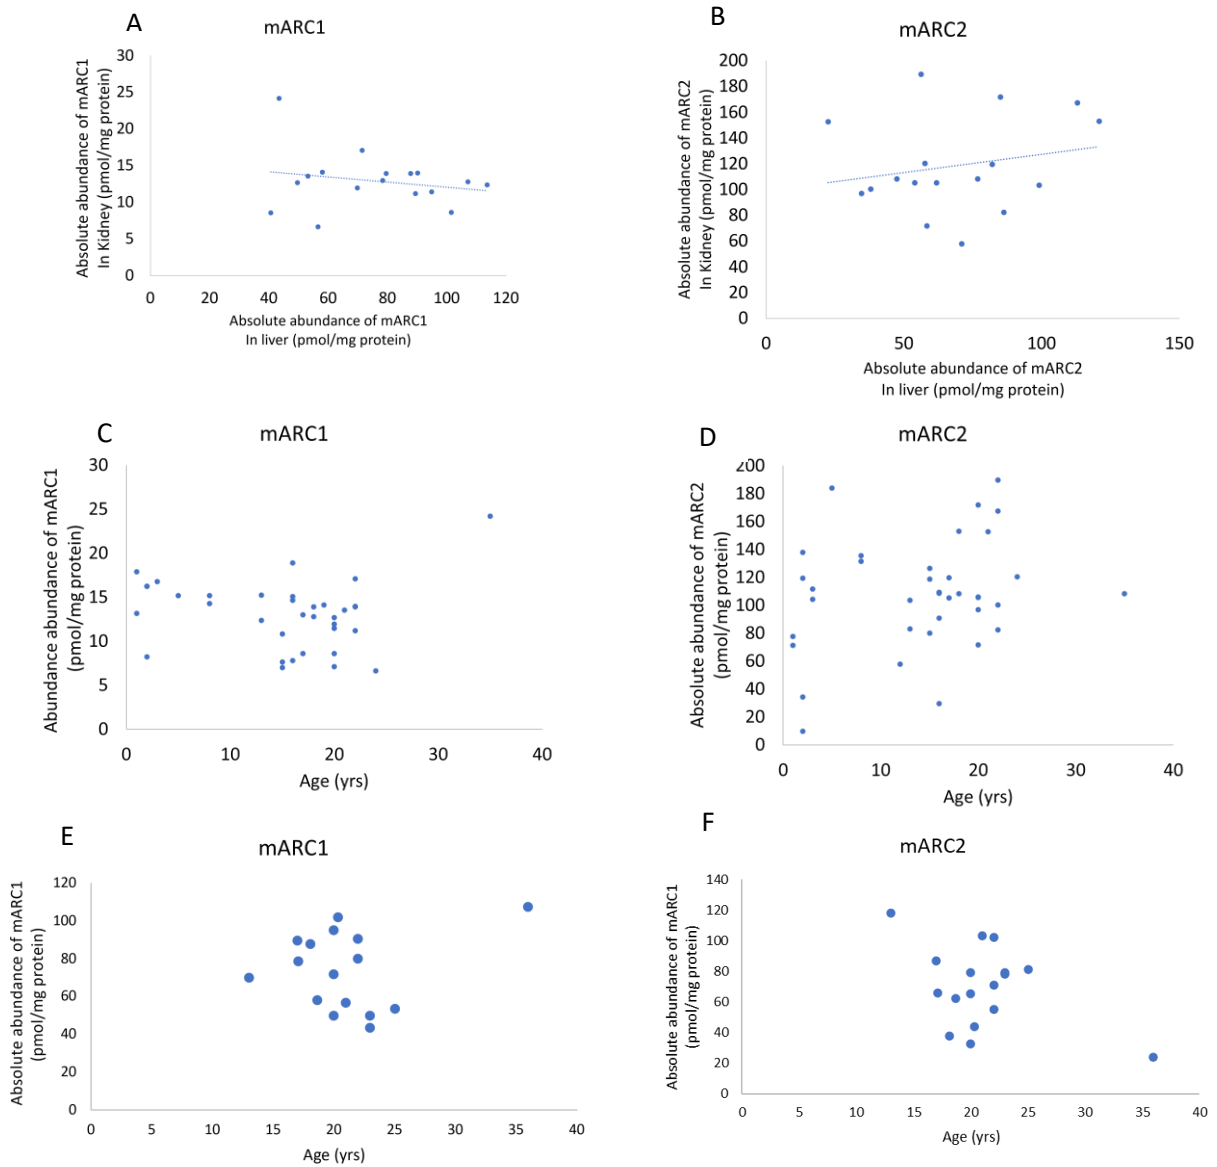

**Figure S2:** Correlation of mARC1 and mARC2 abundance in paired liver and kidney samples (A and B) and age vs. mARC1 and mARC2 abundance in kidney samples (C and D) and liver samples (E and F).

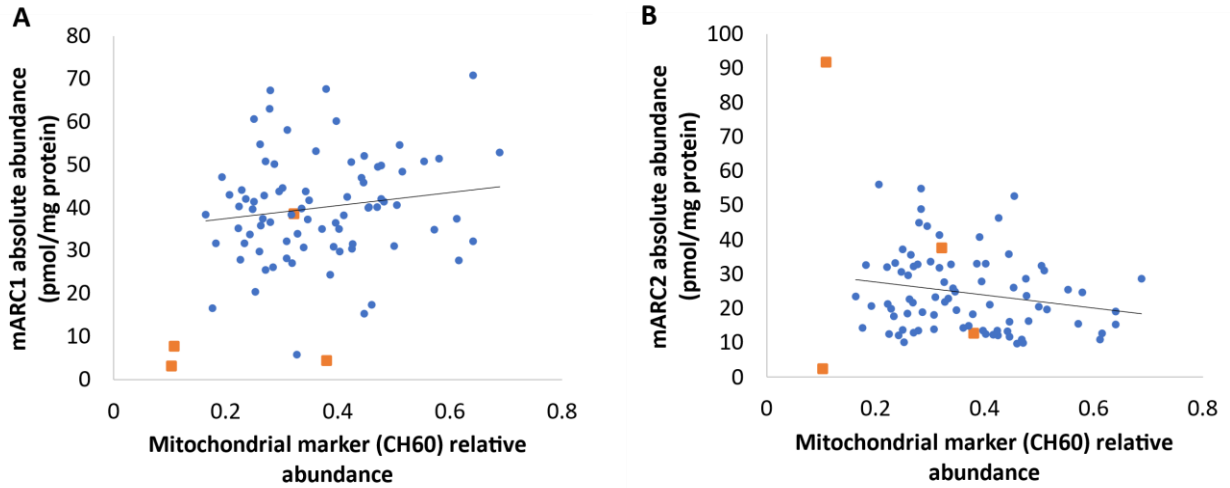

**Figure S3:** Correlation of mitochondrial marker (CH60) and mARC1 (A) and mARC2 (B) abundance in differential tissue (liver, kidney, intestine, and lungs) (orangesquares) and paired liver and kidney samples (blue dots). These data suggest that technical variability in the sample preparation is not a confounder in mARC quantification.

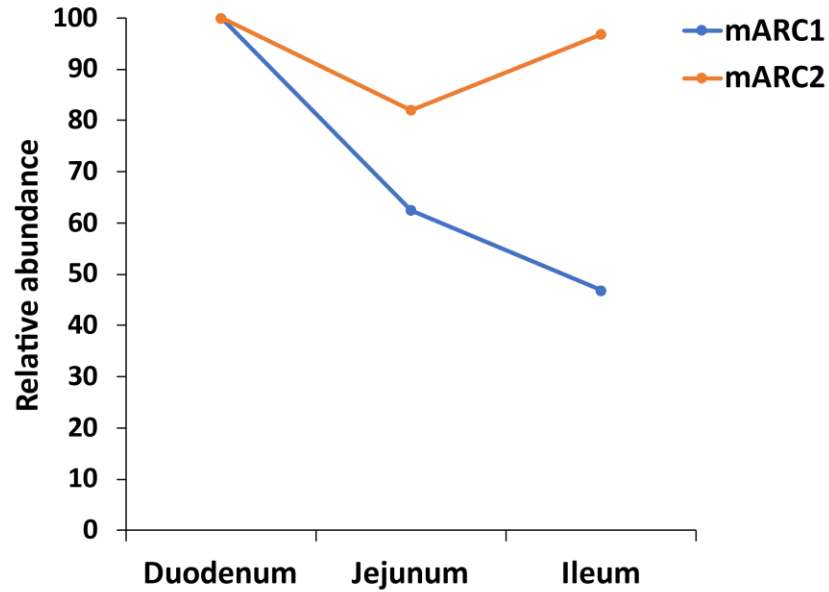

**Figure S4:** Relative abundance of mARC enzymes in CHIM samples isolated from duodenum, jejunum, and ileum sections of human intestine. The relative abundance data were first normalized by the marker levels (villin and FABP2). These marker-normalized data were then expressed as % relative to the duodenum levels.
